# Supplementary material for: Asymmetric metal oxide pseudocapacitors advanced by three-dimensional nanoporous metal electrodes
Source: Royal Society of Chemistry journal article supplement (doi:10.1039/c4ta00965g), 2014-01-01
Supplement: c4ta00965g1.pdf [file c4ta00965g1.pdf]

## Supplementary Information

### **Asymmetric metal oxide pseudocapacitors advanced by three-dimensional nanoporous metal electrodes**

L. Y. Chen,<sup>a</sup> Y. Hou,<sup>a</sup> J. L. Kang,<sup>a</sup> A. Hirata<sup>a</sup> and M. W. Chen<sup>\*,a,b,c</sup>

<sup>a</sup> WPI Advanced Institute for Materials Research, Tohoku University, Sendai 980-8577, Japan

<sup>b</sup> CREST, Japan Science and Technology Agency (JST), Saitama 332-0012, Japan

<sup>c</sup> State Key Laboratory of Metal Matrix Composites, School of Materials Science and Engineering, Shanghai Jiao Tong University, Shanghai 200030, PR China

\* Corresponding author. E-mail: mwchen@wpi-aimr.tohoku.ac.jp

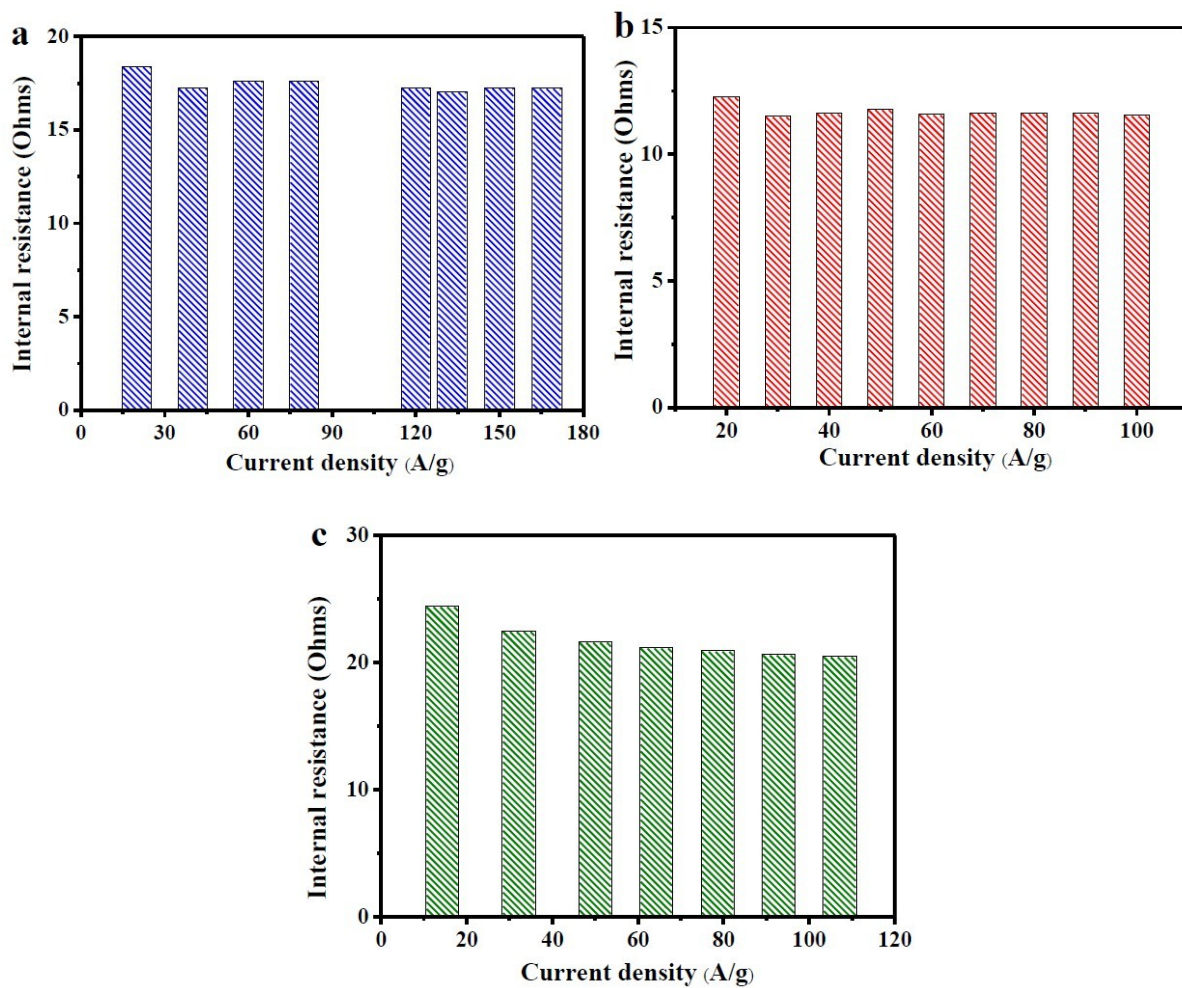

**Fig. S1** Internal resistances of (a) the RuO<sub>2</sub>-NPG electrode; (b) the Co(OH)<sub>2</sub>-NPG electrode; and (c) RuO<sub>2</sub>-NPG//Co(OH)<sub>2</sub>-NPG supercapacitor in 1 M NaOH electrolyte.

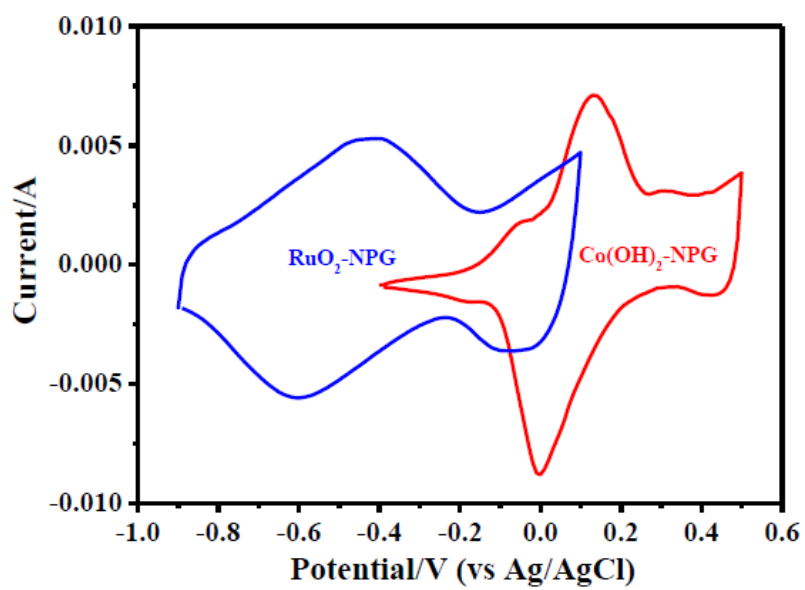

**Fig. S2** Combined CV curves of the RuO<sub>2</sub>-NPG and Co(OH)<sub>2</sub>-NPG electrodes in the three-electrode system.

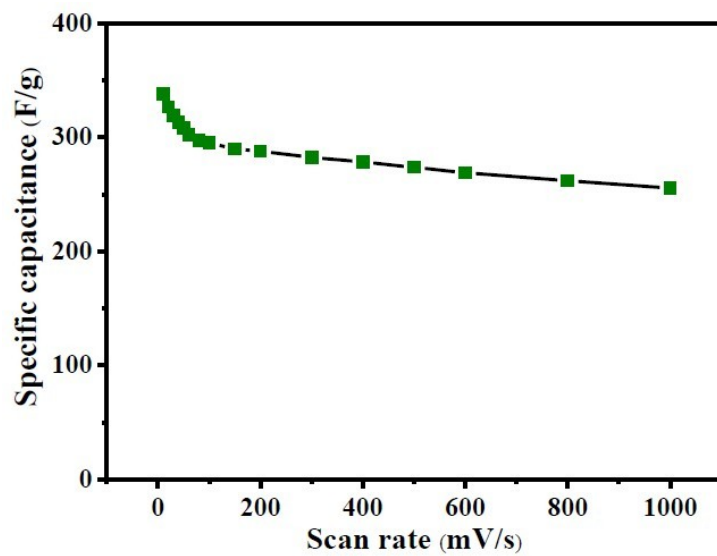

**Fig. S3** Specific capacitance of the RuO<sub>2</sub>-NPG//Co(OH)<sub>2</sub>-NPG supercapacitor at different scan rates in 1 M NaOH electrolyte.

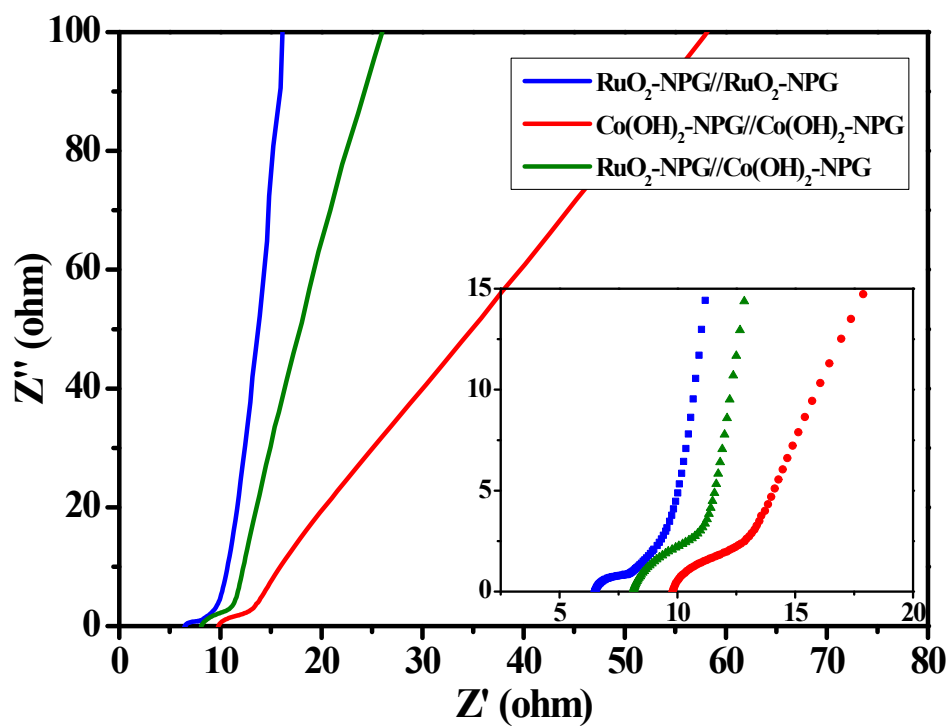

**Fig. S4** EIS spectra of the RuO<sub>2</sub>-NPG//Co(OH)<sub>2</sub>-NPG supercapacitor and relevant symmetric supercapacitors in 1 M NaOH electrolyte.

**Table S1.** Comparison of specific capacitance, energy density, and power density for different asymmetric supercapacitors.

| Electrodes                                      | Specific capacitance (F/g) | Energy density (Wh/kg) | Power density (kW/kg) | Ref.      |
|-------------------------------------------------|----------------------------|------------------------|-----------------------|-----------|
| RuO <sub>2</sub> -NPG//Co(OH) <sub>2</sub> -NPG | 350                        | 120                    | 70                    | This work |
| Transition-metal-oxide nanowire//SWCNT          | 184                        | 25.5                   | 50.3                  | [1]       |
| MnO <sub>2</sub> nanowire//Graphene             | 31                         | 30.4                   | 5                     | [2]       |
| RGO–RuO <sub>2</sub> //RGO–PANI                 | ----                       | 26.3                   | 49.8                  | [3]       |
| Ni(OH) <sub>2</sub> //CNT                       | 112                        | 50.6                   | 2                     | [4]       |
| Graphene MnO <sub>2</sub> //Graphene            | ---                        | 10.03                  | 2.53                  | [5]       |

[1] Chen, P. C.; Shen, G. Shi, Z. Y.; Chen, H. T.; Zhou, C. W. *ACS Nano* 2010, **4**, 4403.

[2] Wu, Z. S.; Ren, W. C.; Wang, D. W.; Li, F.; Liu, B. L.; Cheng, H. M. *ACS Nano* 2010, **4**, 5835.

[3] Zhang, J. T.; Jiang, J. W.; Li, H. L.; Zhao, X. S. *Energy Environ. Sci.* 2011, **4**, 4009.

[4] Tang, Z.; Tang, C. H.; Gong, H. *Adv. Funct. Mater.* 2012, **22**, 1272.

[5] Deng, L. J.; Zhu, G.; Wang, J. F.; Kang, L. P.; Liu, Z. H.; Yang Z. P.; Wang, Z. L. *J. Power sources* 2011, **196**, 10782.

**Equation S1.** Calculating the theoretical specific capacitance of asymmetric supercapacitor from the experimental specific capacitance of electrode material measured by three-electrode method.

$$\frac{1}{C_{sc}} = \frac{1}{C_+} + \frac{1}{C_-}$$
$$C_{sc}^s = \frac{C_{sc}}{M_+ + M_-} \quad (S1)$$

$C_{sc}$  : Capacitance of supercapacitor (measured by 2-electrode method)

$C_+$  : Capacitance of positive electrode (measured by 3-electrode method)

$C_-$  : Capacitance of negative electrode (measured by 3-electrode method)

$C_{sc}^s$  : Specific capacitance of supercapacitor (normalized by weight  $M_+ + M_-$ )

$C_+^s$  : Specific capacitance of positive electrode (normalized by weight  $M_+$ )

$C_-^s$  : Specific capacitance of negative electrode (normalized by weight  $M_-$ )

From the Equation S1, the theoretical specific capacitance of asymmetric supercapacitor can be calculated about  $\sim 375$  F/g, which is close to the experimental value (350 F/g) and evidently lower than the specific capacitance of the electrode material.
